# Supplementary material for: Analysis and Interpretation of Automated Blood Count in the Treatment of Chronic Paracoccidioidomycosis
Source: MDPI journal article supplement (doi:10.3390/jof10050317), 2024-04-27
Supplement: s1 [file s1]

**Supplementary information 1 (Table S1).** Hematological parameters analyzed and reference normal values.

| Hematological parameters                  | Reference values                             |
|-------------------------------------------|----------------------------------------------|
| <b>Red series parameters *</b>            |                                              |
| Total erythrocyte count                   |                                              |
| Males                                     | 4.5 to 6.5 million/mm <sup>3</sup>           |
| Females                                   | 3.9 to 5.6 million/mm <sup>3</sup>           |
| Hemoglobin (Hb)                           |                                              |
| Males                                     | 13.5 to 17.5 g/dL                            |
| Females                                   | 11.5 to 15.5 g/dL                            |
| Hematocrit (Hct)                          |                                              |
| Males                                     | 40 to 52%                                    |
| Females                                   | 36 to 48%                                    |
| Mean hemoglobin corpuscular volume (MCV)  | 80 to 95 fL                                  |
| Mean hemoglobin concentration (MCH)       | 27 to 34 pg                                  |
| Mean cell hemoglobin concentration (MCHM) | 30 to 35 g/dL                                |
| <b>White series parameters *</b>          |                                              |
| Total leukocyte count                     | 4,000 to 11,000/mm <sup>3</sup>              |
| Neutrophils                               | 1,800 to 7,500/mm <sup>3</sup>               |
| Lymphocytes                               | 1,500 to 3,500/mm <sup>3</sup>               |
| Monocytes                                 | 200 to 880/mm <sup>3</sup>                   |
| Eosinophils                               | 40 to 440/mm <sup>3</sup>                    |
| Basophils                                 | 10 to 100/mm <sup>3</sup>                    |
| <b>Platelet parameter</b>                 | 150 to 400 x10 <sup>3</sup> /mm <sup>3</sup> |
| <b>Cell immaturity parameters #</b>       |                                              |
| Immature granulocytes (IG)%; (IG)         | 0 to 0.6%; 0 to 0.06 x10 <sup>3</sup> /μL    |
| Reticulocytes (Ret)%                      | 0.5 to 2.5%                                  |
| Reticulocyte hemoglobin content (Ret-He)  | 28 to 36 pg                                  |
| Fraction of immature reticulocytes (IRF)  | 1.6 to 10.5%                                 |

Source: \*[19]Hoffbrand and Steensma. 2020 # [20] Pekelharing et al., 2010

**Supplementary information 2 (Table S2).** Evaluation of the blood red cells, white blood cells count (in number per cubic millimeter) and platelets count before treatment and its progress after introduction of the antifungal treatment.

| Variable                | Patients<br>(number) | S0<br>Median<br>[Q1;Q3]            | S1<br>Median<br>[Q1;Q3]            | S2<br>Median<br>[Q1;Q3]            | S3<br>Median<br>[Q1;Q3]           | <i>p</i> value   |
|-------------------------|----------------------|------------------------------------|------------------------------------|------------------------------------|-----------------------------------|------------------|
| <b>Red blood series</b> |                      |                                    |                                    |                                    |                                   |                  |
| Erythrocytes            | 55                   | 4.7<br>[4.3; 5.1]                  | ...                                | 4.8<br>[4.5; 5.4]                  | ...                               | <b>0.001</b>     |
| Erythrocytes            | 29                   | 4.7<br>[4.4; 5.1]                  | 4.7<br>[4.4; 5.2]                  | 4.8<br>[4.5; 5.1]                  | 4.8<br>[4.4; 5.3]                 | 0.196            |
| Hemoglobin              | 55                   | 13.7<br>[12.1; 14.9]               | ...                                | 14.6<br>[13.6; 15.6]               | ...                               | <b>&lt;0.001</b> |
| Hemoglobin              | 29                   | 13.9<br>[13.2; 14.8] <sup>cd</sup> | 14.1<br>[13.5; 15.3] <sup>bc</sup> | 14.6<br>[13.9; 15.2] <sup>b</sup>  | 15.1<br>[14.0; 16.1] <sup>a</sup> | <b>&lt;0.001</b> |
| Hematocrit              | 55                   | 42.1<br>[36.8; 45.6]               | ...                                | 44.2<br>[40.5; 47.2]               | ...                               | <b>&lt;0.001</b> |
| Hematocrit              | 29                   | 42.2<br>[38.6; 45.0] <sup>bc</sup> | 42.5<br>[40.7; 44.7] <sup>b</sup>  | 44.3<br>[41.4; 45.7] <sup>ab</sup> | 44.8<br>[41.5; 48.1] <sup>a</sup> | <b>0.009</b>     |
| MCV                     | 55                   | 89.9<br>[86.7; 91.9]               | ...                                | 90.0<br>[88.3; 94.1]               | ...                               | <b>0.004</b>     |
| MCV                     | 29                   | 89.3<br>[87.0; 91.3] <sup>c</sup>  | 89.4<br>[86.6; 93.3] <sup>c</sup>  | 90.4<br>[88.8; 94.2] <sup>ab</sup> | 90.9<br>[89.4; 94.5] <sup>a</sup> | <b>&lt;0.001</b> |
| MHC                     | 55                   | 29.6<br>[28.0; 30.8]               | ...                                | 30.3<br>[29.2; 31.6]               | ...                               | <b>&lt;0.001</b> |
| MHC                     | 29                   | 29.6<br>[27.8; 31.3] <sup>cb</sup> | 29.4<br>[28.5; 31.4] <sup>bc</sup> | 30.3<br>[29.2; 31.7] <sup>ab</sup> | 31.2<br>[29.7; 32.5] <sup>a</sup> | <b>0.003</b>     |

|                           |    |                       |                      |                      |                       |              |
|---------------------------|----|-----------------------|----------------------|----------------------|-----------------------|--------------|
| CMHC                      | 55 | 33.1<br>[32.0; 33.8]  | ...                  | 33.5<br>[32.6; 34.2] | ...                   | <b>0.006</b> |
| CMHC                      | 29 | 33.1<br>[32.2; 34.0]  | 33.4<br>[32.5; 33.8] | 33.3<br>[32.7; 33.9] | 33.8<br>[32.6; 34.4]  | 0.313        |
| RDW <sub>sd</sub>         | 22 | 47.0<br>[44.0; 49.8]  | ...                  | 46.3<br>[45.0; 48.0] | ...                   | 0.984        |
| RDW <sub>sd</sub>         | 07 | 46.0<br>[44.0; 48.6]  | 49.0<br>[46.0; 53.0] | 47.0<br>[45.8; 51.0] | 46.0<br>[44.0; 50.5]  | 0.398        |
| RDW <sub>cv</sub>         | 22 | 14.2<br>[13.6; 15.5]  | ...                  | 14.0<br>[13.1; 14.8] | ...                   | 0.465        |
| RDW <sub>cv</sub>         | 07 | 13.7<br>[13.3; 14.3]  | 14.2<br>[14.1; 15.1] | 13.4<br>[13.1; 14.9] | 13.7<br>[12.6; 14.3]  | 0.239        |
| <b>White blood series</b> |    |                       |                      |                      |                       |              |
| Leukocytes                | 55 | 8200<br>[7000; 10230] | ...                  | 7460<br>[6380; 8885] | ...                   | <b>0.007</b> |
| Leukocytes                | 29 | 8150<br>[6910; 10260] | 7970<br>[5930; 9820] | 7640<br>[6410; 8700] | 7570<br>[6480; 10080] | 0.113        |
| Neutrophils               | 55 | 5062<br>[4199; 6337]  | ...                  | 4422<br>[3350; 5491] | ...                   | <b>0.002</b> |
| Neutrophils               | 29 | 4821<br>[4215; 6102]  | 4303<br>[3683; 5355] | 4422<br>[3305; 5366] | 4350<br>[3318; 5734]  | 0.161        |
| Eosinophils               | 55 | 222<br>[79.5; 448]    | ...                  | 224<br>[130; 430]    | ...                   | 0.897        |
| Eosinophils               | 29 | 229<br>[72.7; 681]    | 357<br>[143; 565]    | 196<br>[147; 622]    | 234<br>[102; 455]     | 0.661        |
| Basophils                 | 55 | 0.00<br>[0.0; 59.1]   | ...                  | 0.00<br>[0.0; 72.3]  | ...                   | 0.071        |

|                        |    |                                   |                                    |                                   |                                    |                   |
|------------------------|----|-----------------------------------|------------------------------------|-----------------------------------|------------------------------------|-------------------|
| Basophils              | 29 | 0.0<br>[0.0; 63.7]                | 0.0<br>[0.0; 63.0]                 | 44.4<br>[0.0; 76.0]               | 0.0<br>[0.0; 64.0]                 | 0.761             |
| Lymphocytes            | 55 | 1997<br>[1493; 2664]              | ...                                | 2197<br>[1665; 2640]              | ...                                | 0.158             |
| Lymphocytes            | 29 | 1956<br>[1582; 2548]              | 2135<br>[1648; 2630]               | 2113<br>[1654; 2653]              | 1995<br>[1544; 2554]               | 0.338             |
| Monocytes              | 55 | 718<br>[525; 990]                 | ...                                | 548<br>[423; 787]                 | ...                                | <b>&lt;0.001</b>  |
| Monocytes              | 29 | 718<br>[565; 953] <sup>a</sup>    | 717<br>[367;829] <sup>ac</sup>     | 549<br>[420; 771] <sup>bc</sup>   | 550<br>[515; 813] <sup>c</sup>     | <b>0.004</b>      |
| NRL                    | 55 | 2.6<br>[1.8; 3.5]                 | ...                                | 2.0<br>[1.5; 3.2]                 | ...                                | <b>0.004</b>      |
| NRL                    | 29 | 2.5<br>[1.6; 3.2]                 | 2.1<br>[1.6; 2.6]                  | 2.1<br>[1.5; 3.2]                 | 2.1<br>[1.5; 3.0]                  | 0.392             |
| MLR                    | 55 | 0.4<br>[0.2; 0.5]                 | ...                                | 0.3<br>[0.2; 0.4]                 | ...                                | <b>&lt;0.001</b>  |
| MLR                    | 29 | 0.39<br>[0.26; 0.48] <sup>a</sup> | 0.31<br>[0.22; 0.41] <sup>ab</sup> | 0.28<br>[0.21; 0.41] <sup>b</sup> | 0.31<br>[0.25; 0.40] <sup>ab</sup> | <b>0.042</b>      |
| <b>Platelet series</b> |    |                                   |                                    |                                   |                                    |                   |
| Platelets              | 55 | 322<br>[259; 403]                 | ...                                | 263<br>[220; 303]                 | ...                                | <b>&lt;0.001</b>  |
| PLR                    | 55 | 0.2<br>[0.1; 0.3]                 | ...                                | 0.1<br>[0.1; 0.2]                 | ...                                | <b>&lt;0.001</b>  |
| Platelets              | 29 | 304<br>[256; 402] <sup>a</sup>    | 268<br>[228; 306] <sup>bcd</sup>   | 242<br>[211; 298] <sup>cd</sup>   | 258<br>[209; 295] <sup>d</sup>     | <b>&lt; 0.001</b> |
| PLR                    | 29 | 0.2<br>[0.1-0.2] <sup>a</sup>     | 0.1<br>[0.1-0.2] <sup>bcd</sup>    | 0.1<br>[0.1-0.1] <sup>cd</sup>    | 0.1<br>[0.1-0.1] <sup>d</sup>      | <b>0.002</b>      |

Results presented as; median [Q1: first quartile; Q3: third quartile]; MCV: mean hemoglobin corpuscular volume; MCH: mean hemoglobin concentration; CHCM: mean corpuscular hemoglobin concentration; RDWsd: range of distribution of erythrocytes - expressed as standard deviation; RDWcv: range of distribution of erythrocytes - expressed as coefficient of variation; NLR: neutrophil/lymphocyte ratio; MLR: monocyte/lymphocyte ratio; PLR: platelet/lymphocyte ratio; Platelet count: number  $\times 10^3$ /cubic millimeter; **S0** – before treatment; **S1** - between the beginning of treatment and after clinical improvement; **S2** - clinical cure; **S3** - serological cure.

Statistical tests: Wilcoxon W test or paired Student's T test; Friedman test – post hoc (Durbin-Conover). Lower-case letters compare medians in the same row; medians followed by different letters are statistically different ( $p \leq 0.05$ ), while followed by the same letter or not followed by any letter do not differ ( $p > 0.05$ ).

**Supplementary information 3 (Table S3).** Differences in values in hematological parameters between clinical cure (S2) and pre-treatment (S0), according to the antifungal used, in 55 patients with the chronic form of paracoccidioidomycosis.

| Parameters<br>(cell/mm <sup>3</sup> ) | Cotrimoxazole n=20     | Itraconazole n= 35       | p value † |
|---------------------------------------|------------------------|--------------------------|-----------|
|                                       | Median [Q1; Q3]        | Median [Q1; Q3]          |           |
| Erythrocytes*                         | 0.015 [0.15; 0.63]     | 0.3 [-0.1; 0.46]         | 0.479     |
| RetHe                                 | 2 [0.9; 4.4]           | 1 [0; -30.6]             | 0.569     |
| Leukocytes                            | -2490 [-1080; -2940]   | -340 [-1680; 590]        | 0.478     |
| Neutrophils                           | -2262.2 [67.25; 25.95] | -3534.8 [-2270; -5667.2] | 0.902     |
| IG                                    | 0.05 [0.04; -0.05]     | 0.04 [-0.01-0.28]        | 0.870     |
| Platelets **                          | -35 [-174; -54]        | -36 [-21; -61]           | 0.700     |

\*Erythrocytes: million/mm<sup>3</sup>; Platelet count: number  $\times 10^3$ /mm<sup>3</sup>.

Statistical tests: Wilcoxon signed rank test.
